# Supplementary material for: Comparison of Reactive Sites in 2(1H)-Quinolone Derivatives for the Detection of Biologically Important Sulfur Compounds
Source: MDPI journal article supplement (doi:10.3390/molecules28165965), 2023-08-09
Supplement: s1 [file s1]

# Comparison of reactive sites in 2(1*H*)-quinolone derivatives for the detection of biologically important sulfur compounds

Jolanta Kolińska\*, Aleksandra Grzelakowska, Marcin Szala, Radosław Podsiadły

*Institute of Polymer and Dye Technology, Faculty of Chemistry, Lodz University of Technology, Stefanowskiego 16, 90-537 Lodz, Poland*

\*Corresponding author: [jolanta.kolinska@p.lodz.pl](mailto:jolanta.kolinska@p.lodz.pl)

## Supplementary Information

### Contents

1. **Figs S1-S3** <sup>1</sup>H NMR spectra of **Q1-Q3** in DMSO-*d*<sub>6</sub>
2. **Figs S4-S6** HRMS spectra of **Q1-Q3**
3. **Fig. S7** The fluorescence decay profiles of the compounds **Q1-Q4** in acetonitrile with excitation at 376.2 nm. Lamp response was determined using Ludox. The fitting of the decay profiles to a three-exponential function. Residuals are shown versus time
4. **Tab. S1** The fluorescence lifetimes, quantum yields, and rate constant for radiative and non-radiative decay in acetonitrile
5. **Fig. S8** Changes in the absorption spectra of **Q1** (10 μM), **Q2** (6 μM), **Q3** (10 μM) over time towards L-Cys and L-GSH (100 μM) in 0.1 M phosphate buffer with CH<sub>3</sub>CN (20%, v/v, pH=7.4)

6. **Fig. S9** Fluorescence intensity of **Q4** (20  $\mu$ M) at different pH values in the absence/presence of  $\text{HSO}_3^-$  (1 mM)
7. **Fig. S10**  $^1\text{H}$ -NMR spectra of **Q3** in the presence of excess ME (2-mercaptoethanol) in dimethyl sulphoxide- $d_6$
8. **Fig. S11** ESI mass spectrum of **Q3** (10  $\mu$ M) with 2-mercaptoethanol (1000  $\mu$ M)
9. **Fig. S12** Fluorescence intensity of **Q1** (10  $\mu$ M), **Q2** (6  $\mu$ M), **Q3** (10  $\mu$ M) in 0.1 M phosphate buffer with  $\text{CH}_3\text{CN}$  (20%, v/v, pH=7.4) in the presence of biothiols (1 mM), NEM (1 mM)

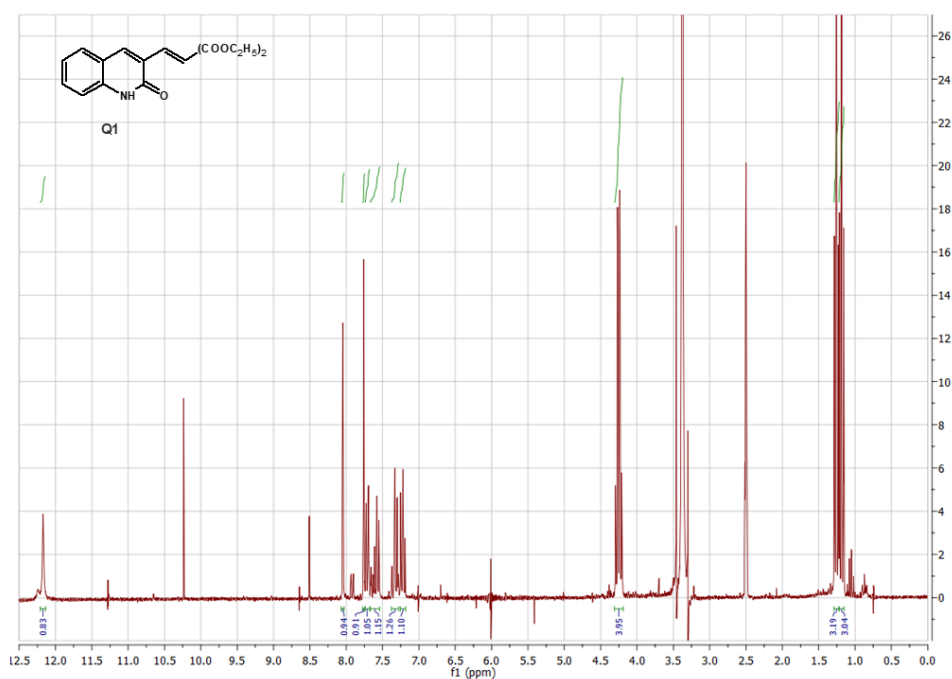

**Figure S1**  $^1\text{H}$  NMR spectrum of **Q1** in  $\text{DMSO}-d_6$

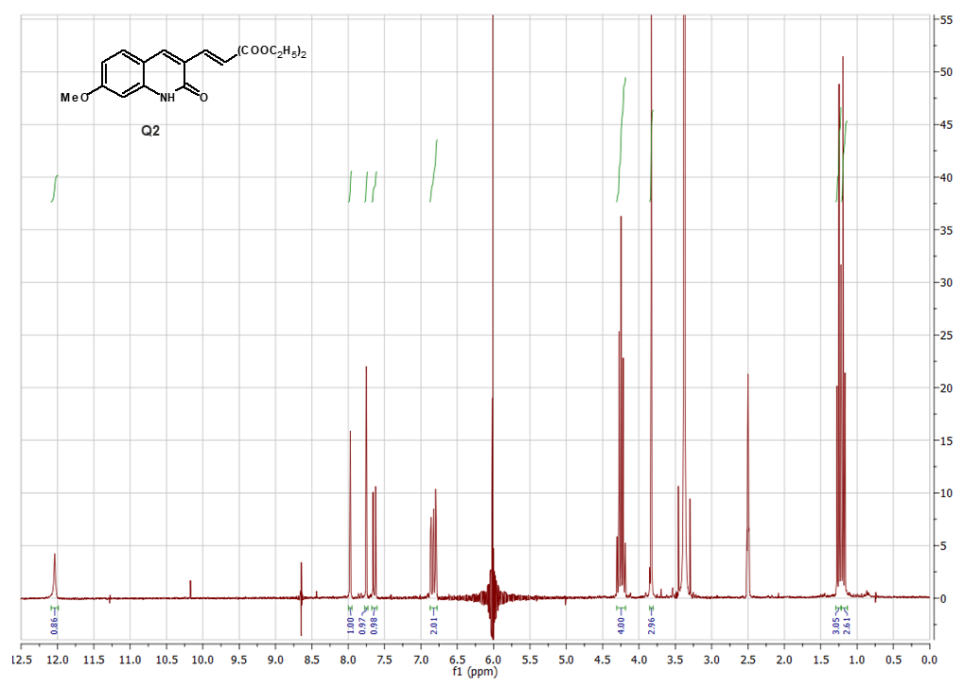

**Figure S2** <sup>1</sup>H NMR spectrum of **Q2** in DMSO-*d*<sub>6</sub>

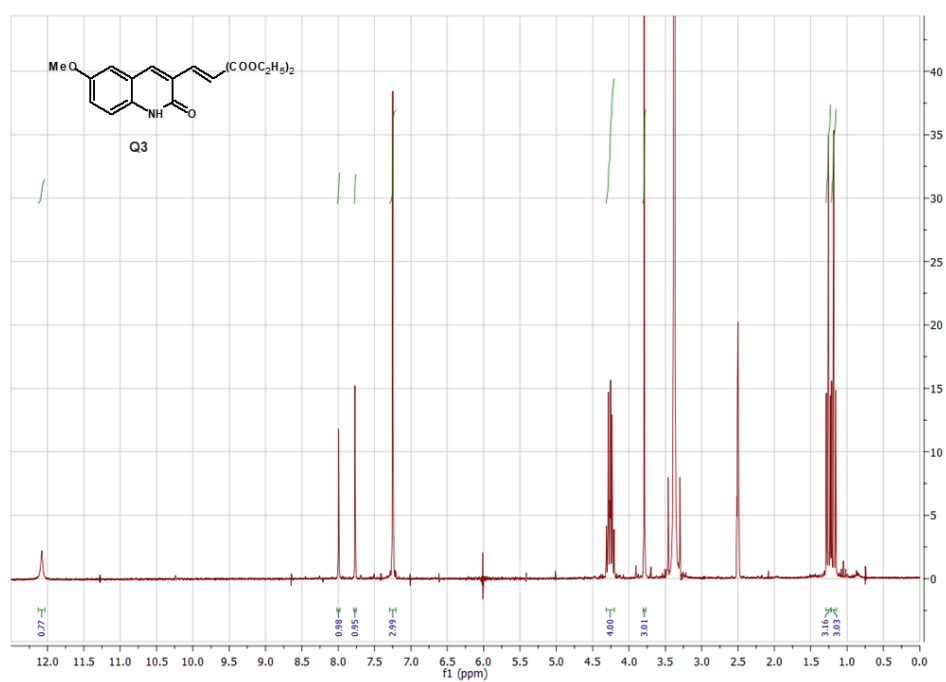

**Figure S3** <sup>1</sup>H NMR spectrum of **Q3** in DMSO-*d*<sub>6</sub>

Monoisotopic Mass, Even Electron Ions

58 formula(e) evaluated with 1 results within limits (all results (up to 1000) for each mass)

Elements Used:

C: 0-35 H: 0-60 N: 0-1 O: 0-6

210217\_5a\_AGA 17 (0.197) Cm (12:17-5:10)

TOF MS ES+  
9.39e+005

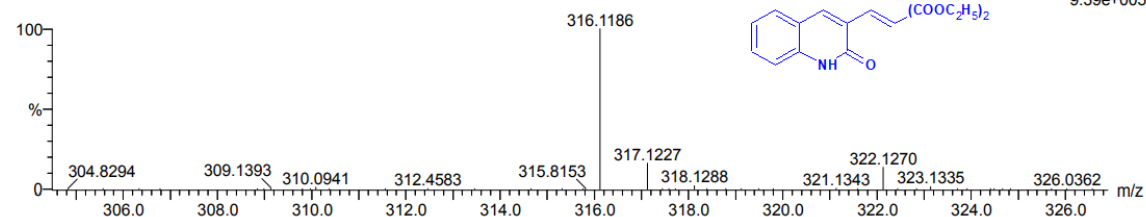

Minimum: -1.5  
Maximum: 80.0

| Mass     | Calc. Mass | mDa | PPM | DBE | i-FIT | Norm | Conf (%) | Formula      |
|----------|------------|-----|-----|-----|-------|------|----------|--------------|
| 316.1186 | 316.1185   | 0.1 | 0.3 | 9.5 | 193.7 | n/a  | n/a      | C17 H18 N O5 |

**Figure S4** HRMS spectrum of **Q1**

Monoisotopic Mass, Even Electron Ions

121 formula(e) evaluated with 1 results within limits (all results (up to 1000) for each mass)

Elements Used:

C: 0-35 H: 0-60 N: 0-1 O: 0-6 Na: 0-1

210217\_5b\_AG 23 (0.248) Cm (23:29-3:9)

1: TOF MS ES+  
2.01e+006

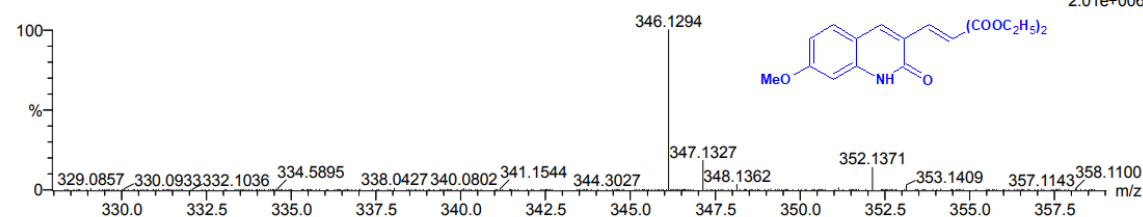

Minimum: -1.5  
Maximum: 80.0

| Mass     | Calc. Mass | mDa | PPM | DBE | i-FIT | Norm | Conf (%) | Formula      |
|----------|------------|-----|-----|-----|-------|------|----------|--------------|
| 346.1294 | 346.1291   | 0.3 | 0.9 | 9.5 | 952.6 | n/a  | n/a      | C18 H20 N O6 |

**Figure S5** HRMS spectrum of **Q2**

Monoisotopic Mass, Even Electron Ions

121 formula(e) evaluated with 1 results within limits (all results (up to 1000) for each mass)

Elements Used:

C: 0-35 H: 0-60 N: 0-1 O: 0-6 Na: 0-1

210217\_5c\_AG 17 (0.197) Cm (12:17-2:9)

1: TOF MS ES+  
2.70e+006

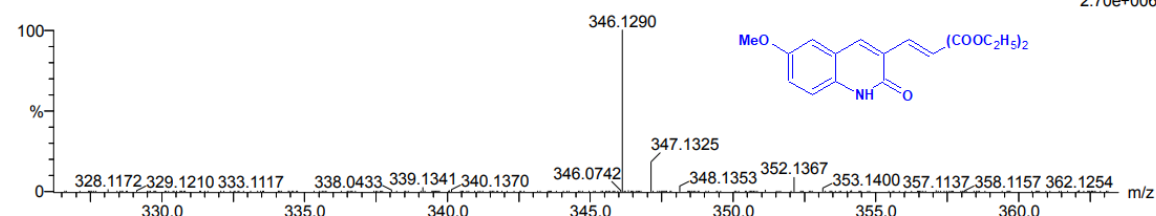

Minimum: -1.5  
Maximum: 80.0

| Mass     | Calc. Mass | mDa  | PPM  | DBE | i-FIT | Norm | Conf (%) | Formula      |
|----------|------------|------|------|-----|-------|------|----------|--------------|
| 346.1290 | 346.1291   | -0.1 | -0.3 | 9.5 | 735.1 | n/a  | n/a      | C18 H20 N O6 |

**Figure S6** HRMS spectrum of Q3

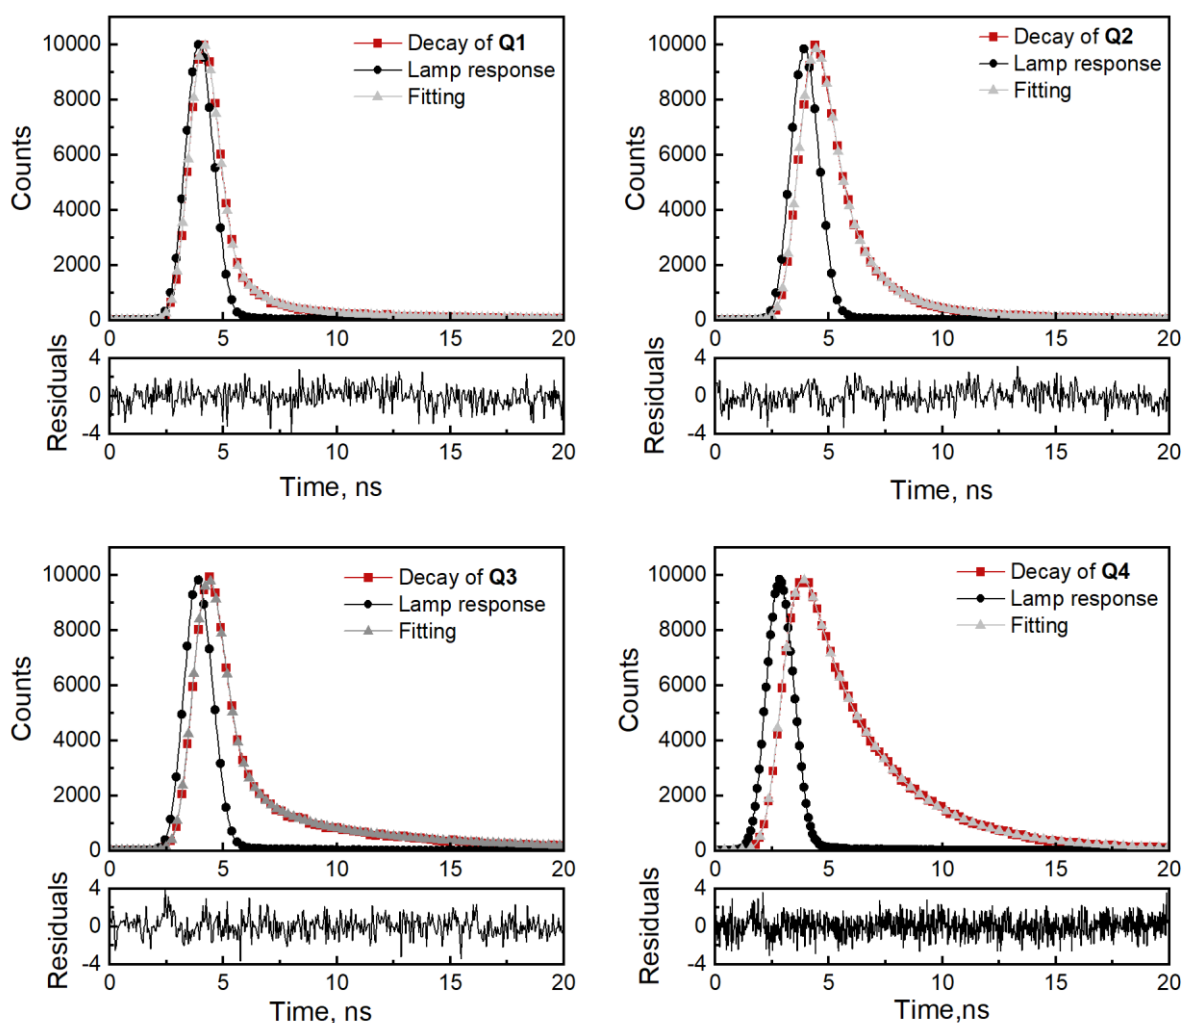

**Figure S7** The fluorescence decay profiles of the compounds Q1-Q4 in acetonitrile with excitation at 376.2 nm. Lamp response was determined using Ludox. The fitting of the decay profiles to a three-exponential function. Residuals are shown versus time

**Table S1** The fluorescence lifetimes, quantum yields, and rate constant for radiative and non-radiative decay in acetonitrile

|    | $\Phi_{em} (-)$ | $\tau$ (ns) | $k_r$ ( $10^9 s^{-1}$ ) | $k_{nr}$ ( $10^9 s^{-1}$ ) | $k_r/k_{nr}$ |
|----|-----------------|-------------|-------------------------|----------------------------|--------------|
| Q1 | 0.0020          | 1.25        | 0.0016                  | 0.7984                     | 0.0020       |
| Q2 | 0.0019          | 1.86        | 0.0010                  | 0.5366                     | 0.0019       |

|           |        |      |        |        |        |
|-----------|--------|------|--------|--------|--------|
| <b>Q3</b> | 0.0242 | 3.09 | 0.0078 | 0.3157 | 0.0248 |
| <b>Q4</b> | 0.0930 | 3.12 | 0.0298 | 0.2907 | 0.1025 |

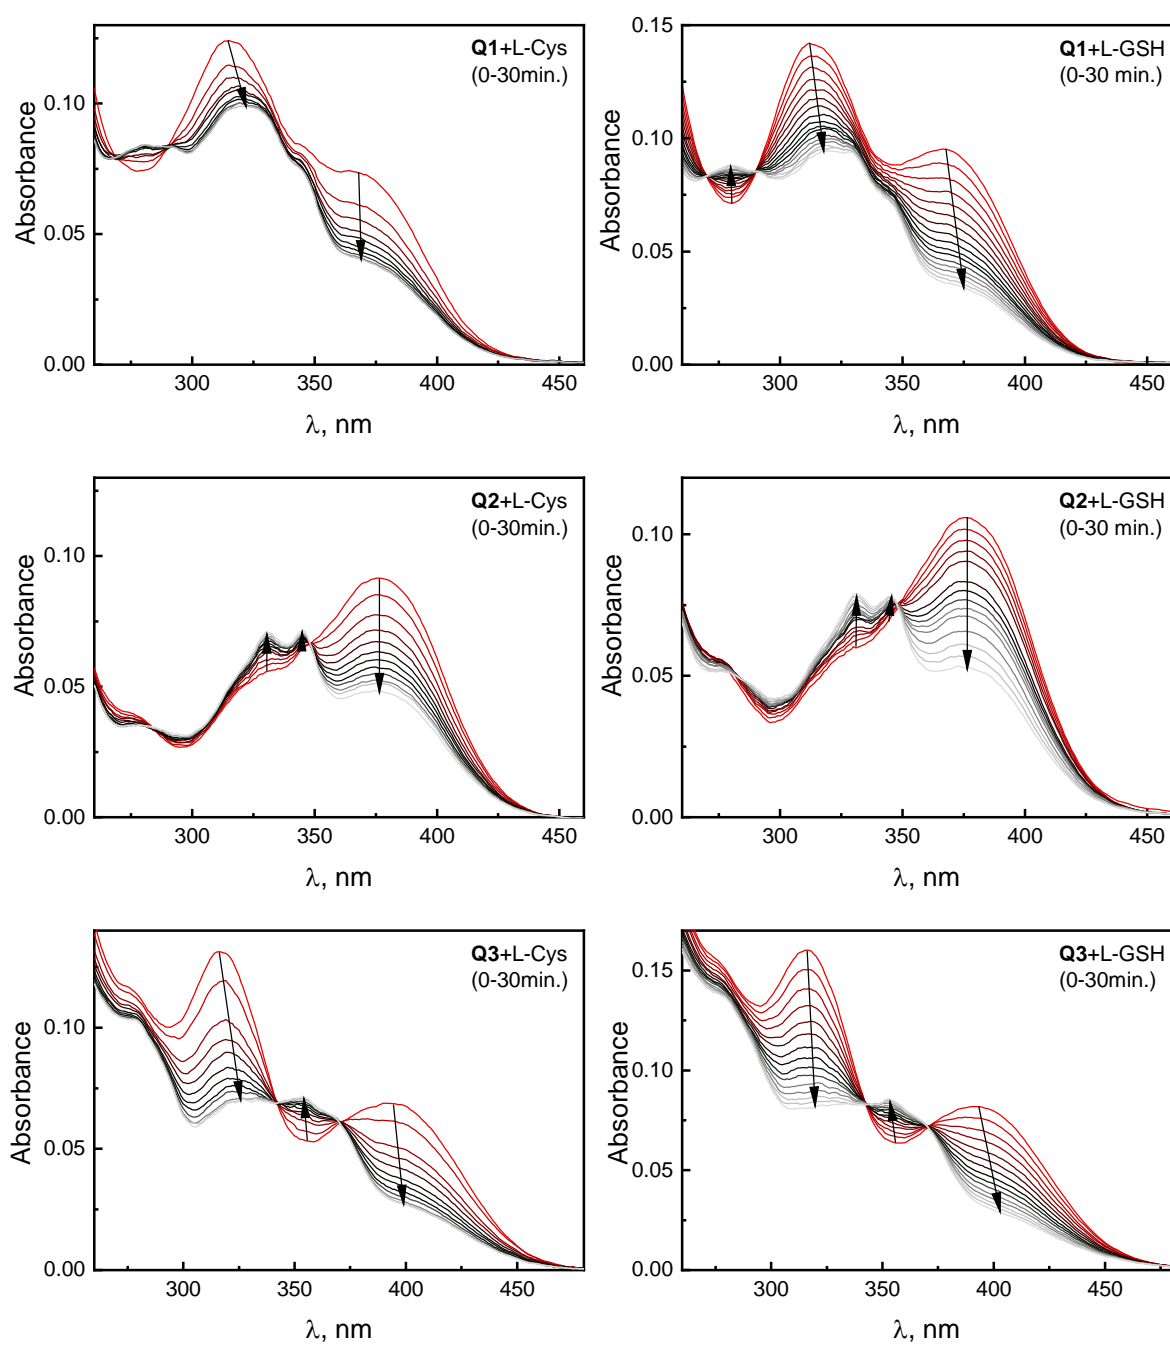

**Figure S8** Changes in the absorption spectra of **Q1** (10  $\mu$ M), **Q2** (6  $\mu$ M), **Q3** (10  $\mu$ M)

over time toward L-Cys and L-GSH (100  $\mu$ M) in 0.1 M phosphate buffer with CH<sub>3</sub>CN  
(20%, v/v, pH=7.4)

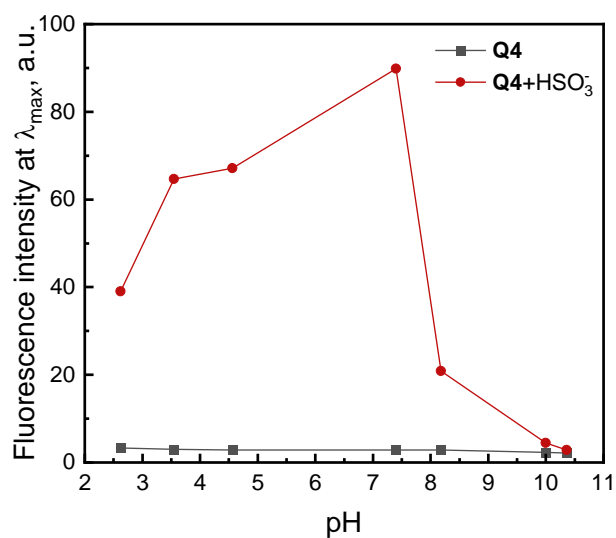

**Figure S9** Fluorescence intensity of **Q4** (20  $\mu$ M) at different pH values in the absence/presence of HSO<sub>3</sub><sup>-</sup> (1 mM)

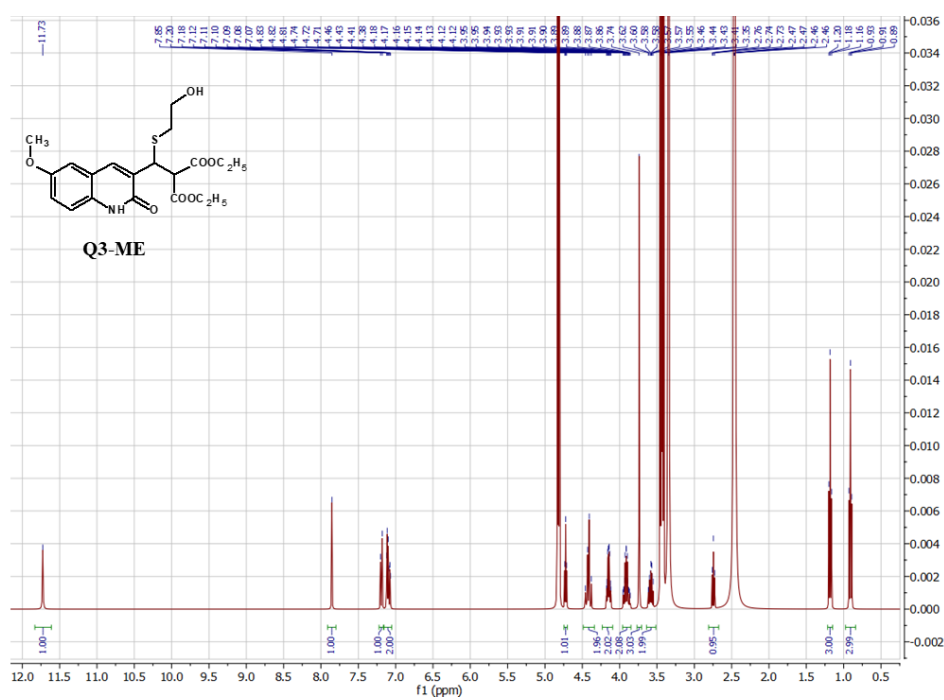

DMSO-*d*<sub>6</sub>

**Figure S10**  $^1\text{H}$ -NMR spectra of **Q3** in the presence of excess ME (2-mercaptoethanol) in dimethyl sulfoxide- $d_6$

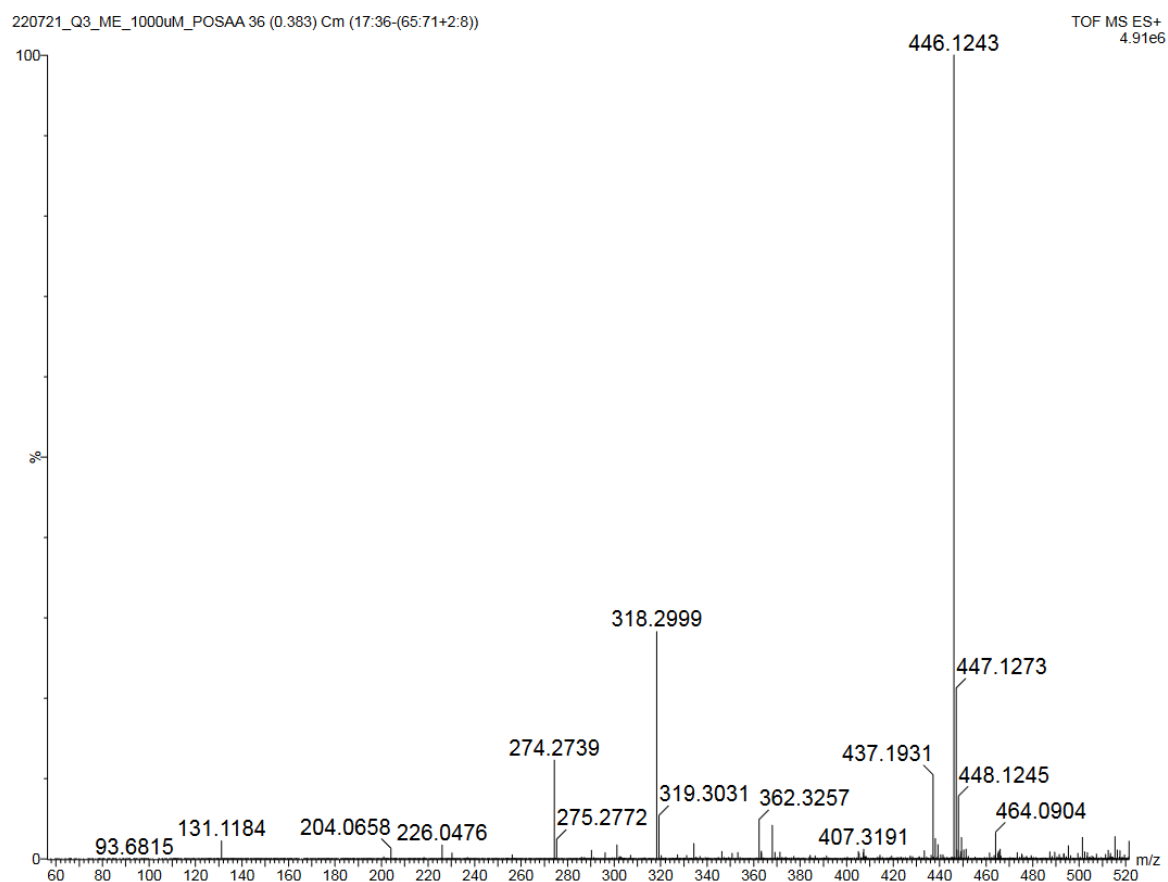

**Figure S11** ESI mass spectrum of **Q3** (10  $\mu\text{M}$ ) with 2-mercaptoethanol (1000  $\mu\text{M}$ )

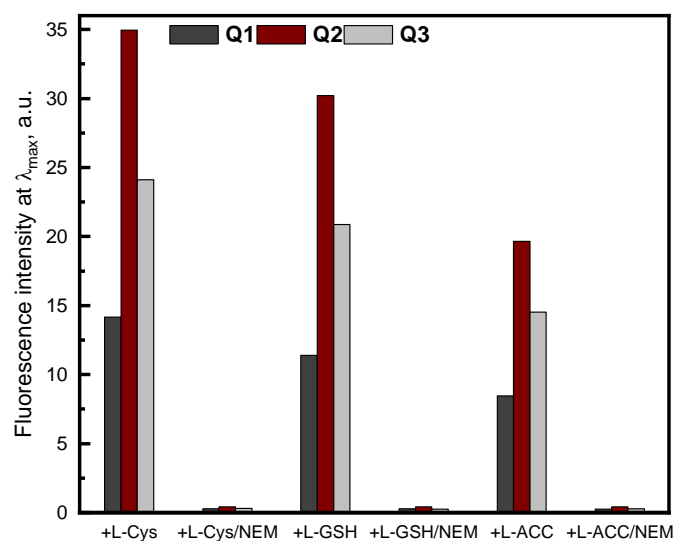



**Figure S12** Fluorescence intensity of **Q1** (10  $\mu$ M), **Q2** (6  $\mu$ M), **Q3** (10  $\mu$ M) in 0.1 M phosphate buffer with CH<sub>3</sub>CN (20%, v/v, pH=7.4) in the presence of biothiols (1 mM), NEM (1 mM)
